# Supplementary material
Source: PubMed Central journal article supplement (PMC3130306)

**A**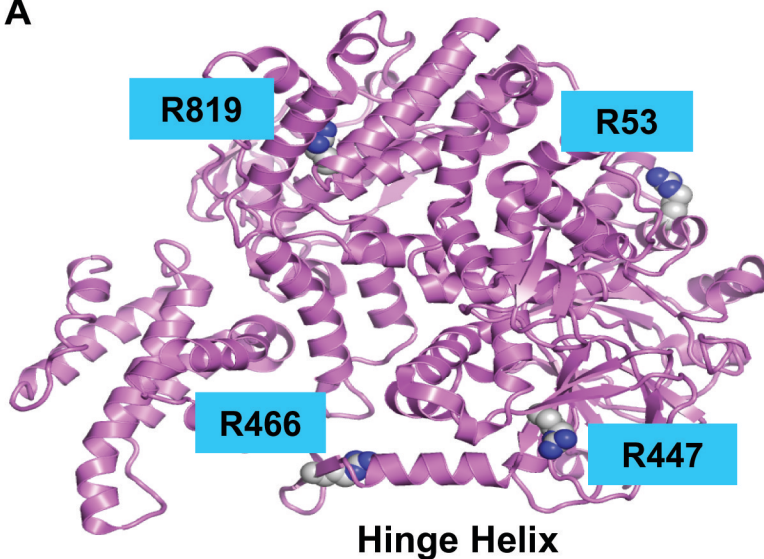**B**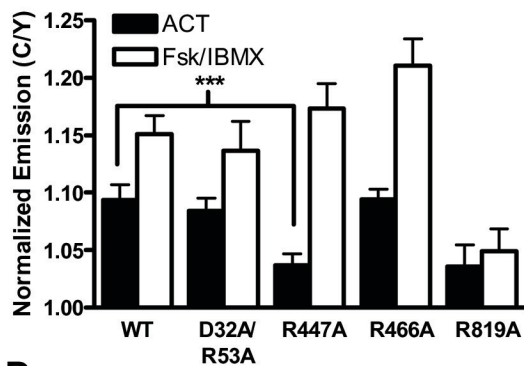**C**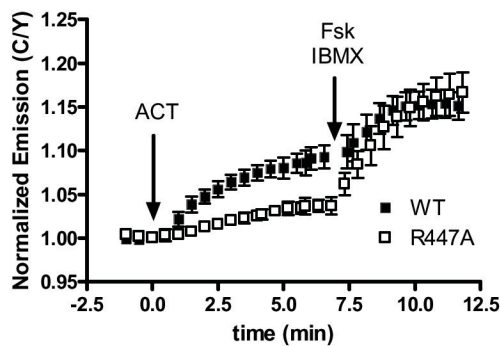**D**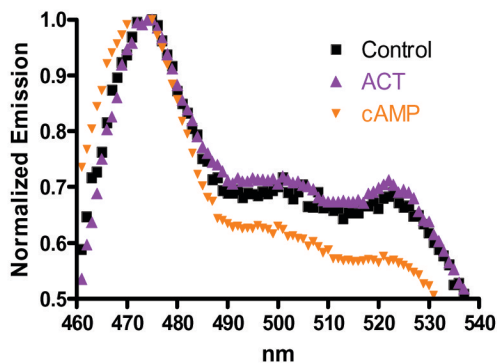**E**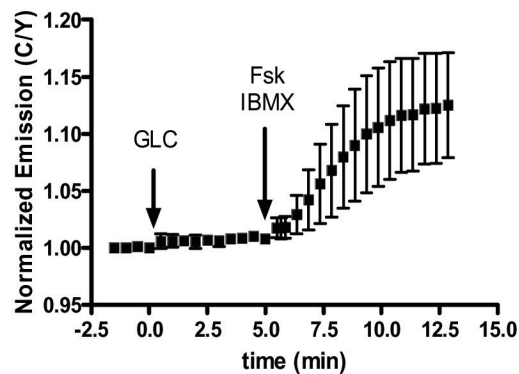

Supplement: NIHMS301820-supplement-Figure_S2.pdf [file NIHMS301820-supplement-Figure_S2.pdf]

**A**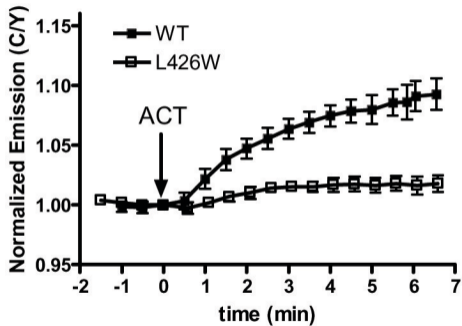**B**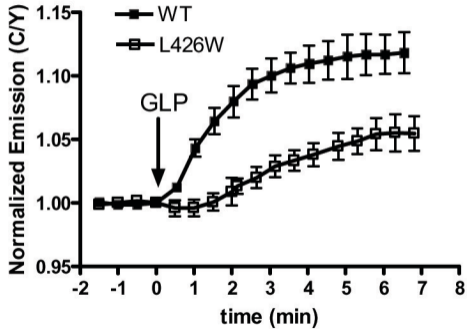

Supplement: NIHMS301820-supplement-Figure_S3.pdf [file NIHMS301820-supplement-Figure_S3.pdf]

# A Epac1 Biosensor (ICUE1)

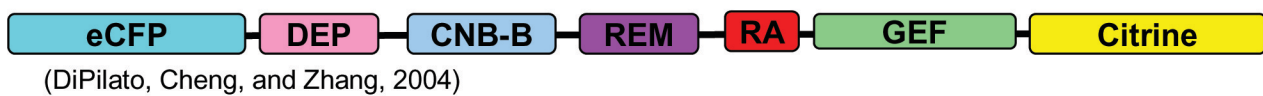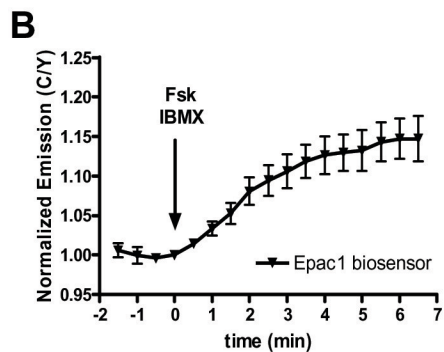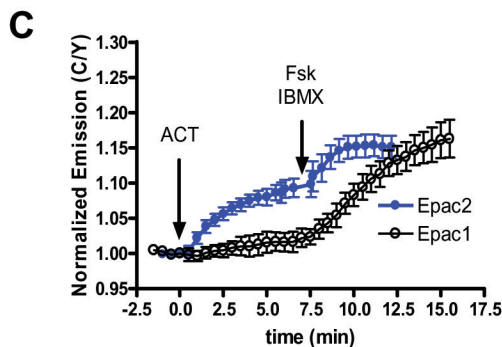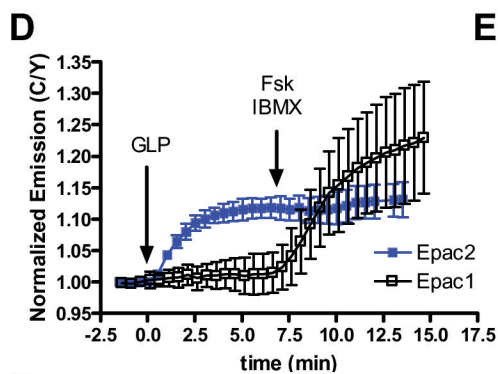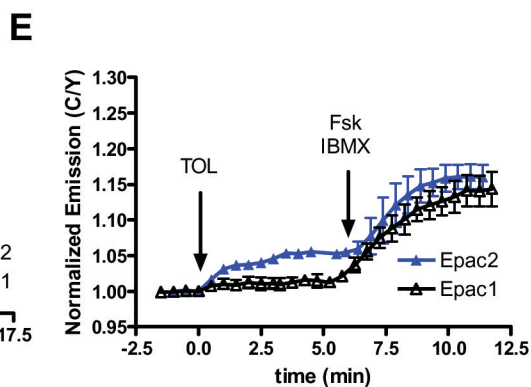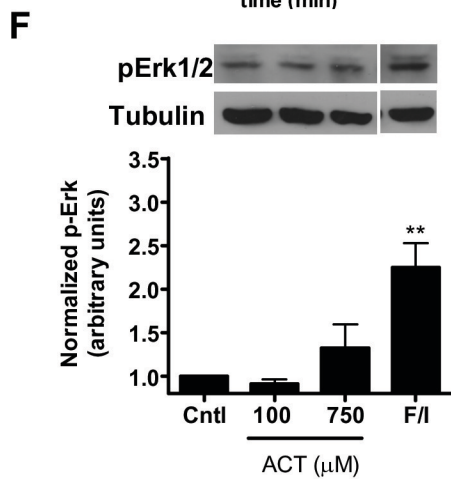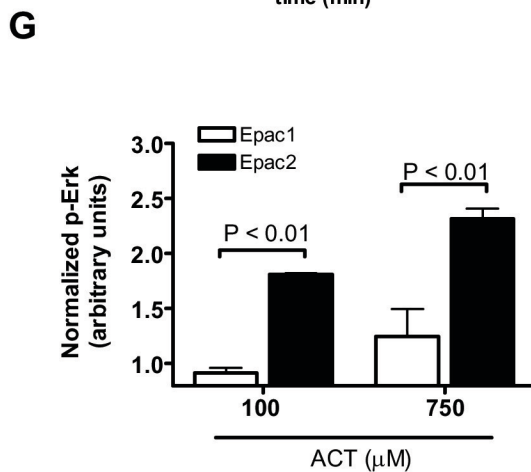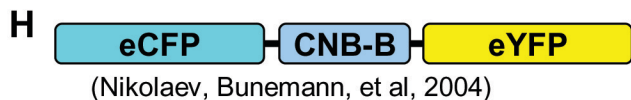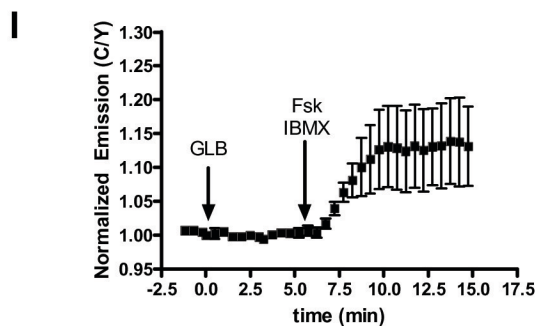

Supplement: NIHMS301820-supplement-Figure_S4.pdf [file NIHMS301820-supplement-Figure_S4.pdf]
